# Supplementary material
Source: PubMed Central journal article supplement (PMC10273002)
Supplement: S1368980014001657sup001.pdf [file S1368980014001657sup001.pdf]

# Supplementary material

**A. Per capita growth (%) of beverages volume beverage category**

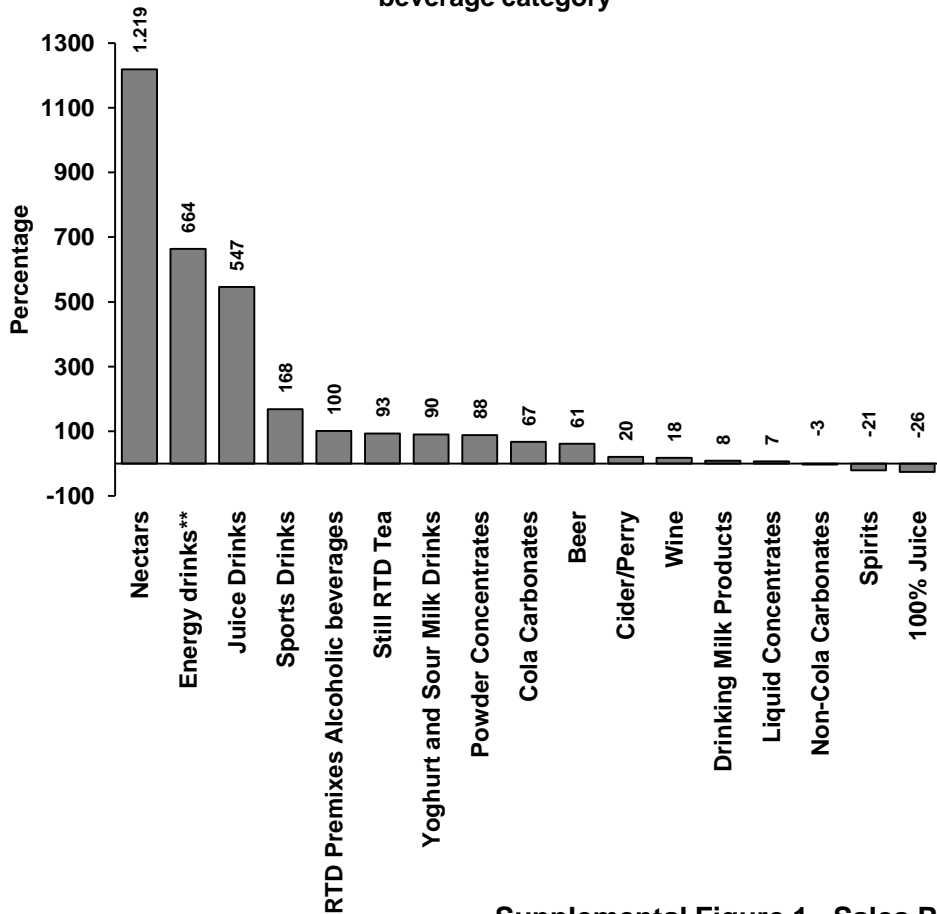

**B. Sales of selected beverages (litres per capita) by year**

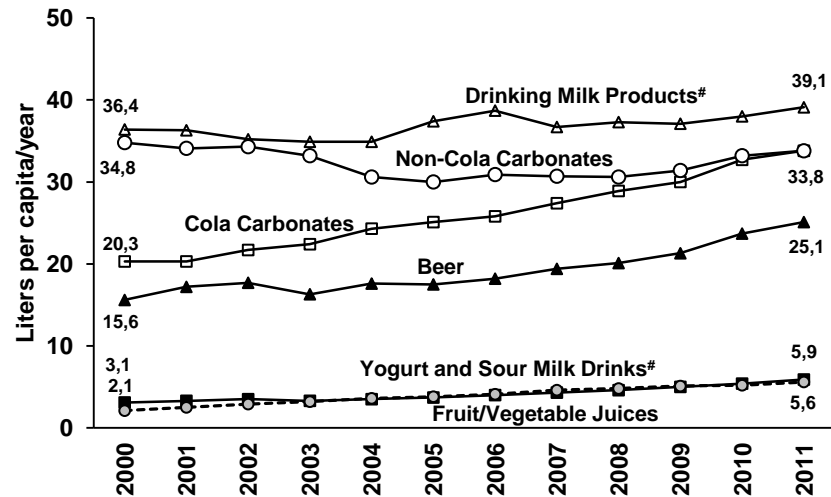

**Supplemental Figure 1. Sales Patterns for Beverages in Brazil, 2000 to 2011\***

\* energy drinks from 2005-2011

# kg/per capita / year

Source: *Euromonitor International*
